# Supplementary material for: Comparing Dimerization Free Energies and Binding Modes of Small Aromatic Molecules with Different Force Fields
Source: Molecules. 2021 Oct 7;26(19):6069. doi: 10.3390/molecules26196069 (PMC8512883; doi:10.3390/molecules26196069)
Supplement: Supplementary file 1 [file molecules-26-06069-s001.zip › molecules-1393609-supplementary.pdf]

# Supplementary Material for

## Comparing dimerization free energies and binding modes of small aromatic molecules with different force fields

Ilias Patmanidis,<sup>1</sup> Riccardo Alessandri,<sup>1,2</sup> Alex H. de Vries,<sup>1</sup> Siewert J. Marrink<sup>\*1</sup>

<sup>1</sup> *Groningen Biomolecular Sciences and Biotechnology Institute and Zernike Institute for Advanced Materials, University of Groningen, Nijenborgh 7, 9747 AG Groningen, The Netherlands*

<sup>2</sup> *Pritzker School of Molecular Engineering, University of Chicago, Chicago, Illinois 60637, United States*

E-mail: s.j.marrink@rug.nl

| Name          | Molecule ID | Opt. Solvation Free Energy | Simulation time (ns) |
|---------------|-------------|----------------------------|----------------------|
| Benzene       | 804         | ✓                          | 100                  |
| Toluene       | 21          | ✓                          | 100                  |
| Chlorobenzene | 3176        | ✓                          | 150                  |
| Phenol        | 1061        | ✓                          | 100                  |
| Styrene       | 1266        | ✓                          | 100                  |
| para-Cresol   | 17          | ✓                          | 150                  |
| Cyclohexane   | 17666       | ✓                          | 100                  |
| Naphthalene   | 820         | ✓                          | 100                  |
| Pyrene        | 7233        | ✓                          | 150                  |
| Tetracene     | 33259       | ✗                          | 150                  |

**Table S1:** ATB entries for the topologies used. Most of the parameters have been optimised to reproduce experimental solvation free energies.

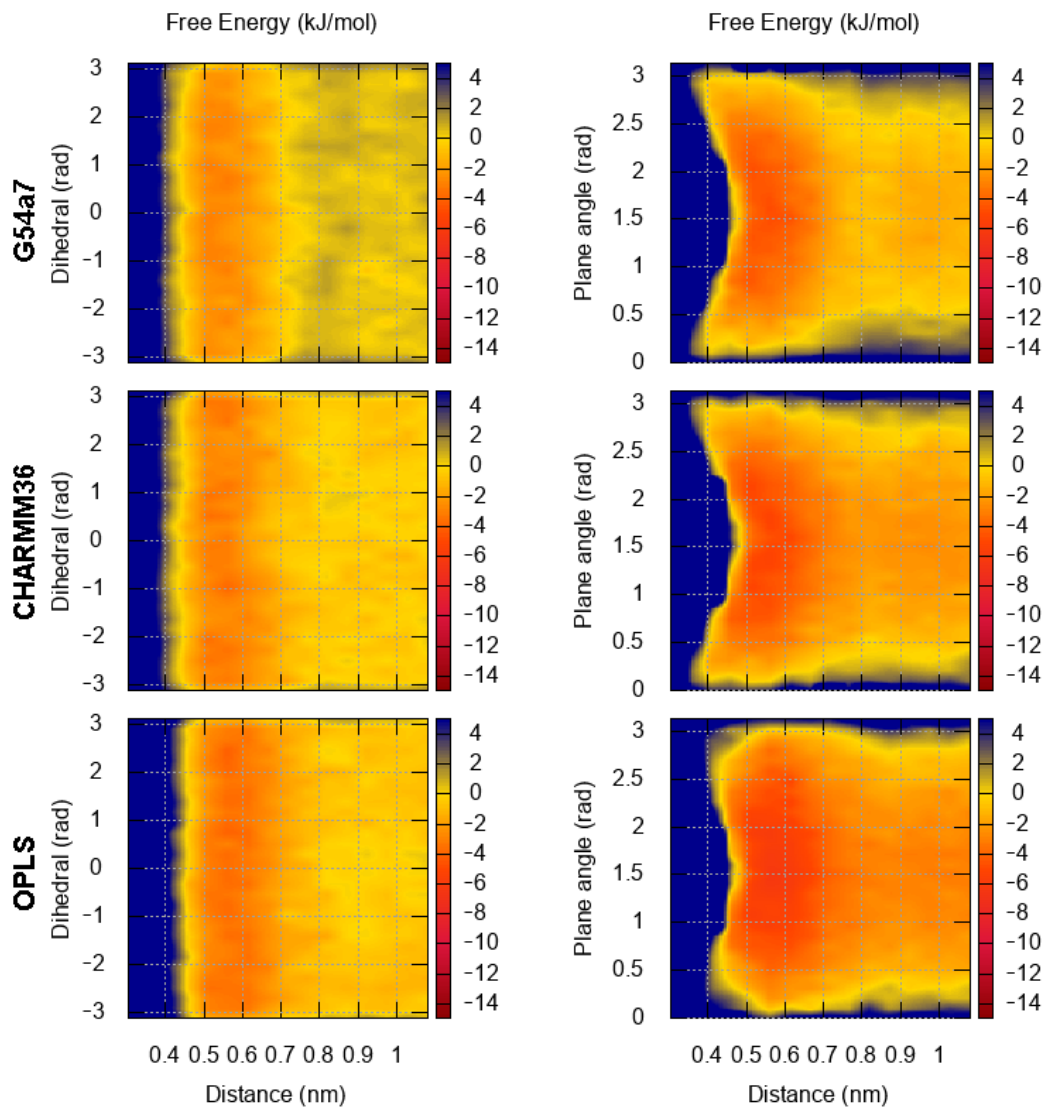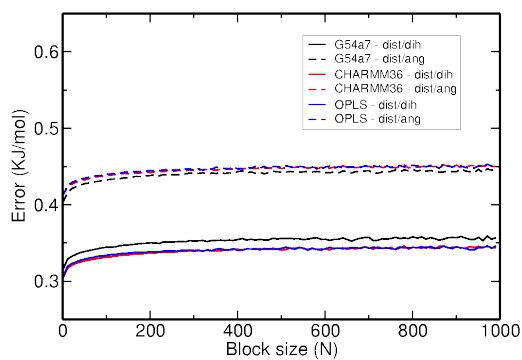

**Figure S1:** FES for the dimerization of toluene (top) and statistical error of the FES calculations as a function of the block size (bottom).

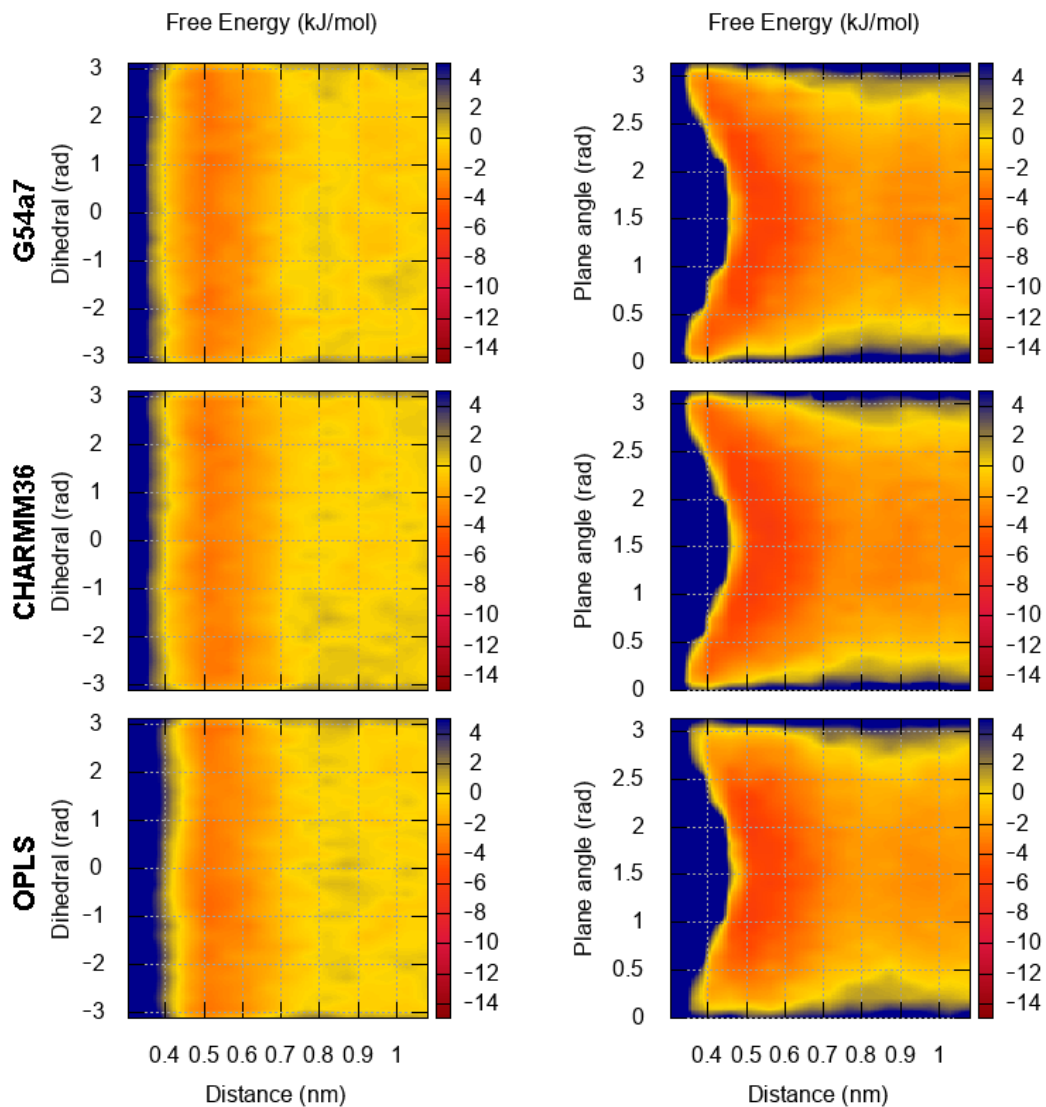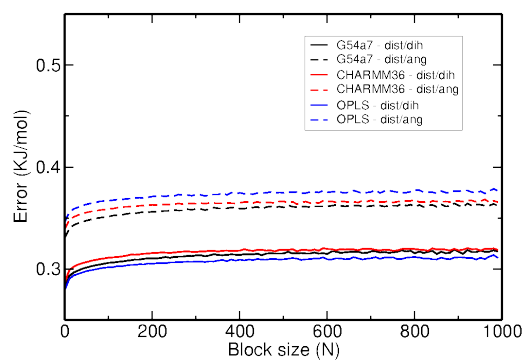

**Figure S2:** FES for the dimerization of chlorobenzene (top) and statistical error of the FES calculations as a function of the block size (bottom).

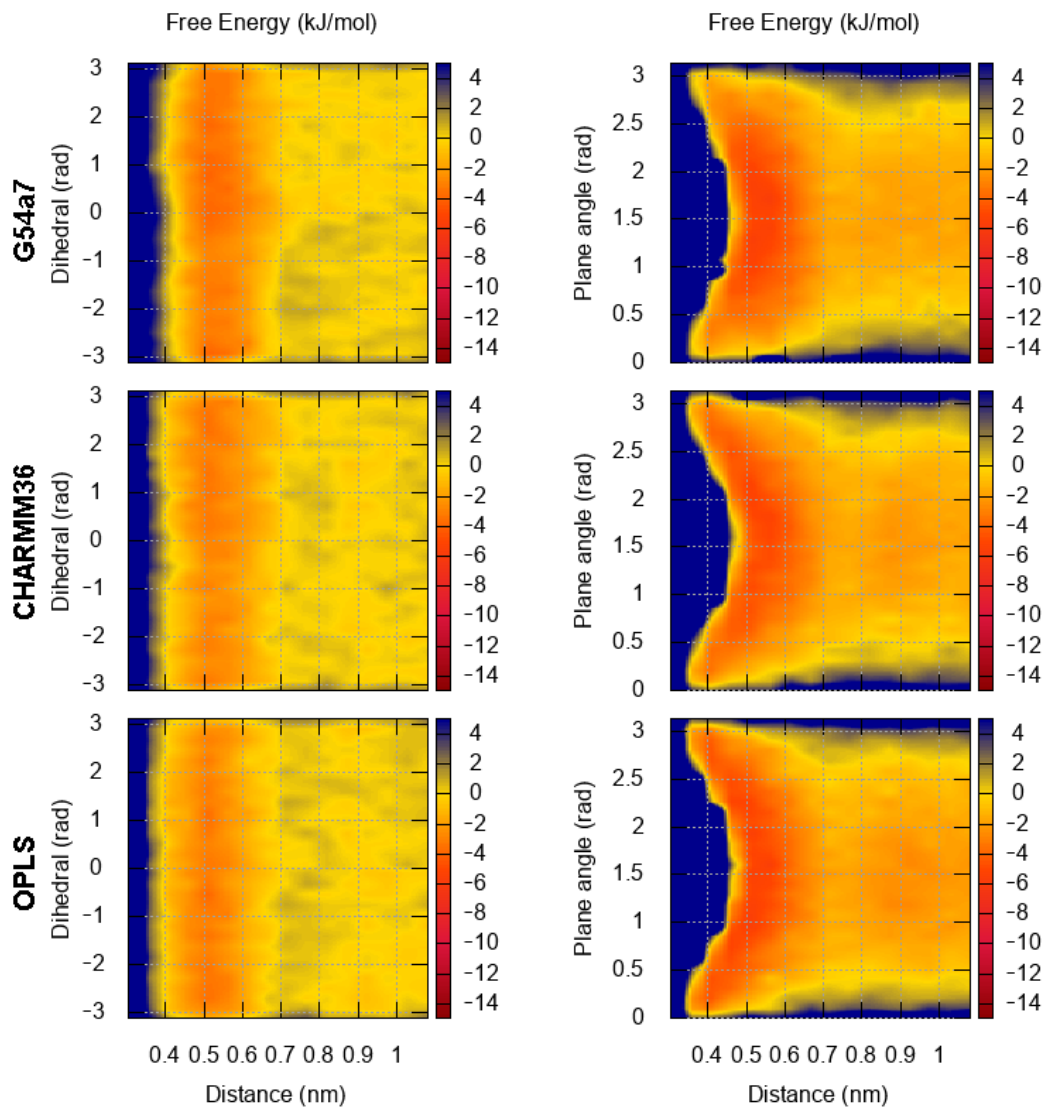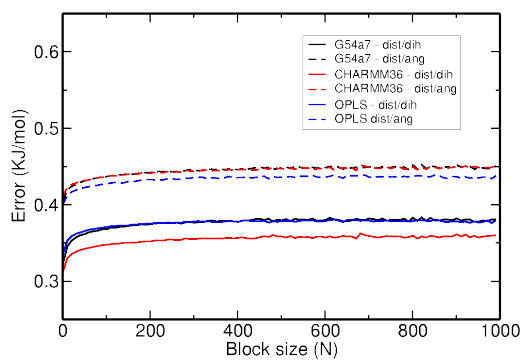

**Figure S3:** FES for the dimerization of phenol (top) and statistical error of the FES calculations as a function of the block size (bottom).

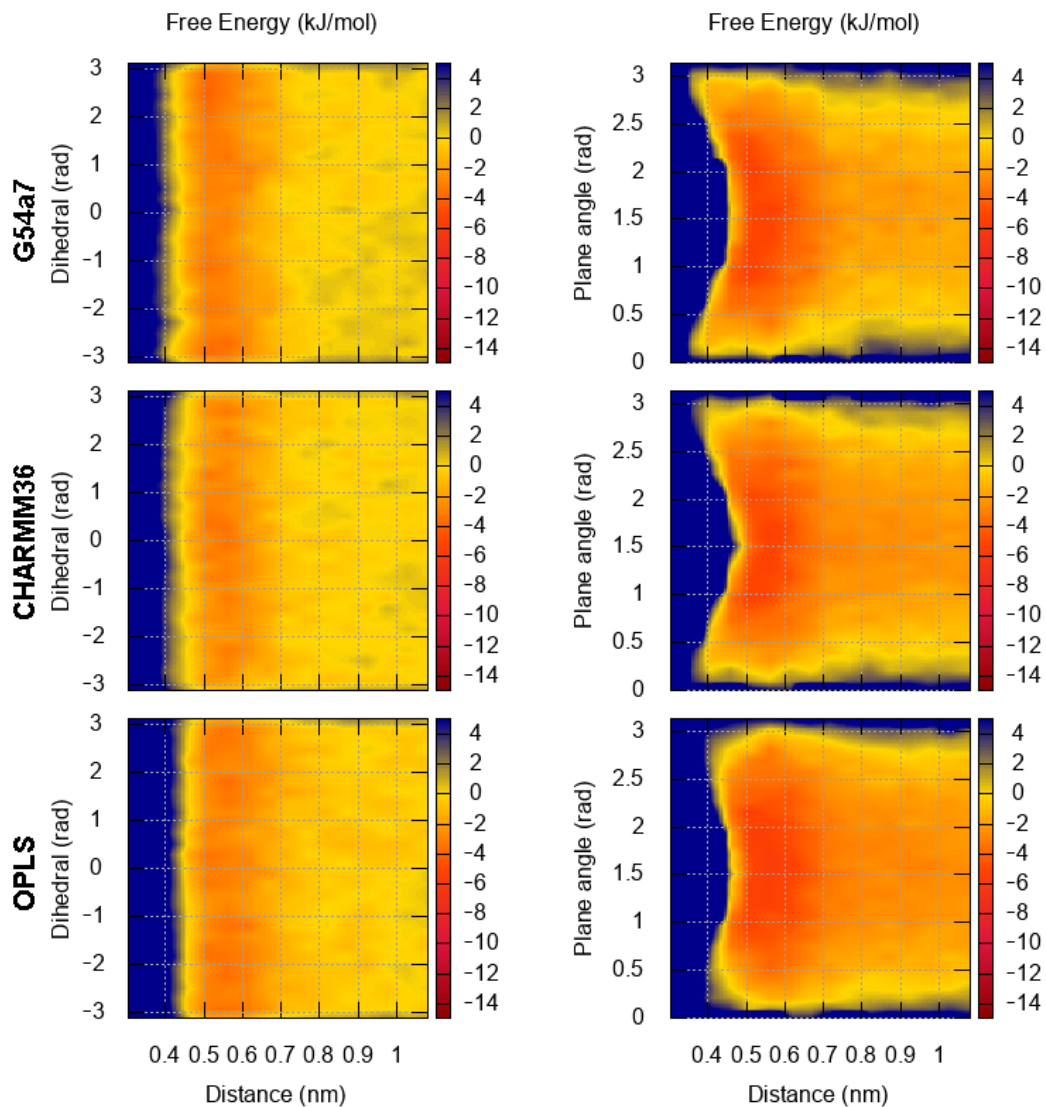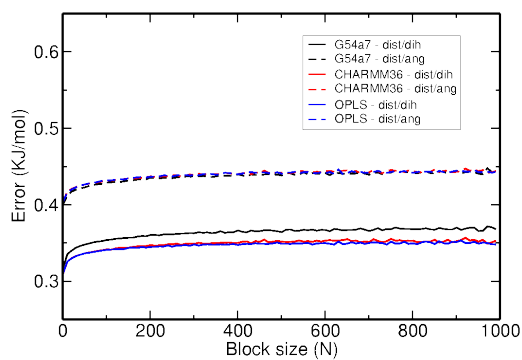

**Figure S4:** FES for the dimerization of styrene (top) and statistical error of the FES calculations as a function of the block size (bottom).

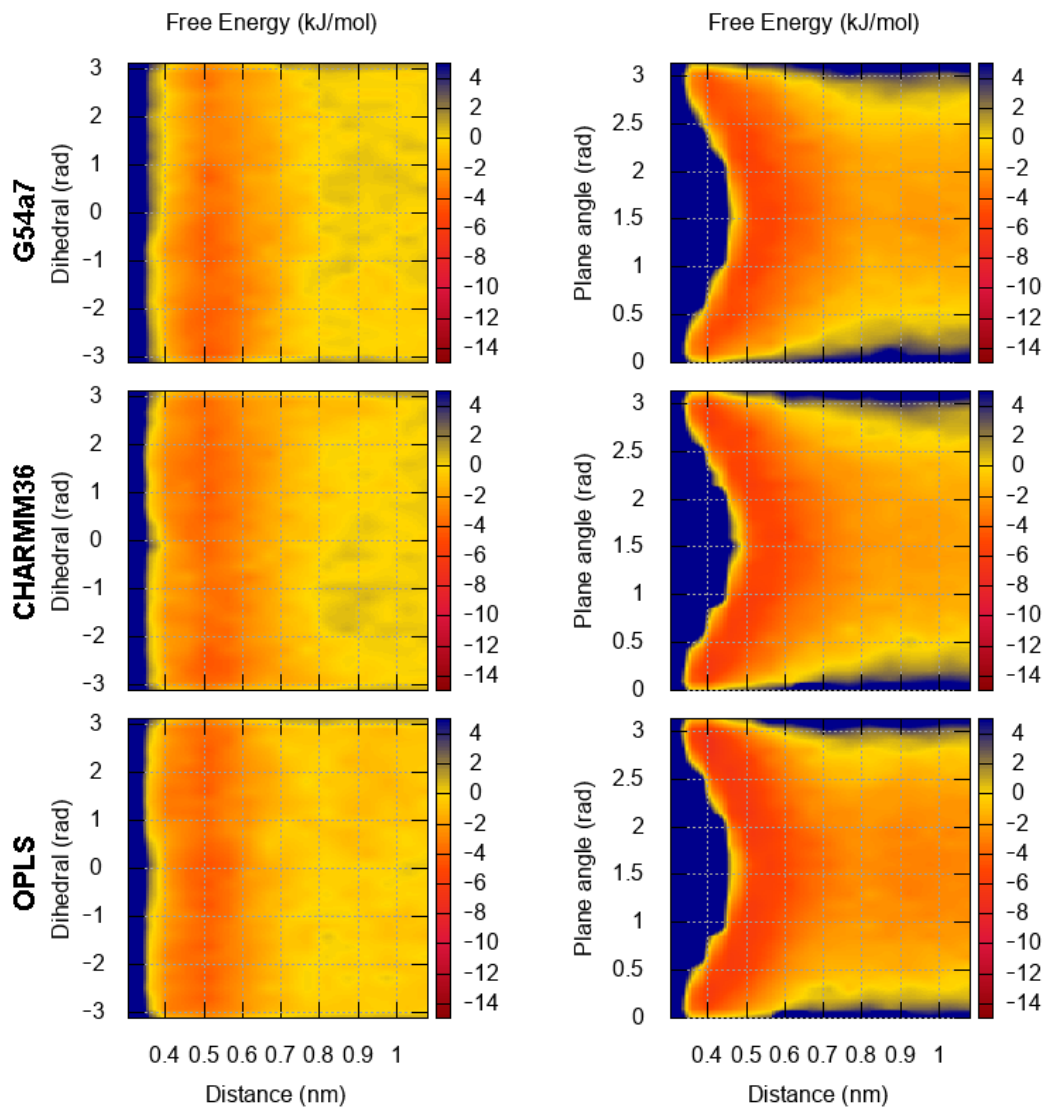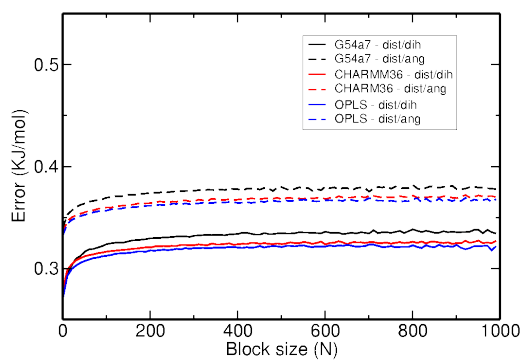

**Figure S5:** FES for the dimerization of para-cresol (top) and statistical error of the FES calculations as a function of the block size (bottom).

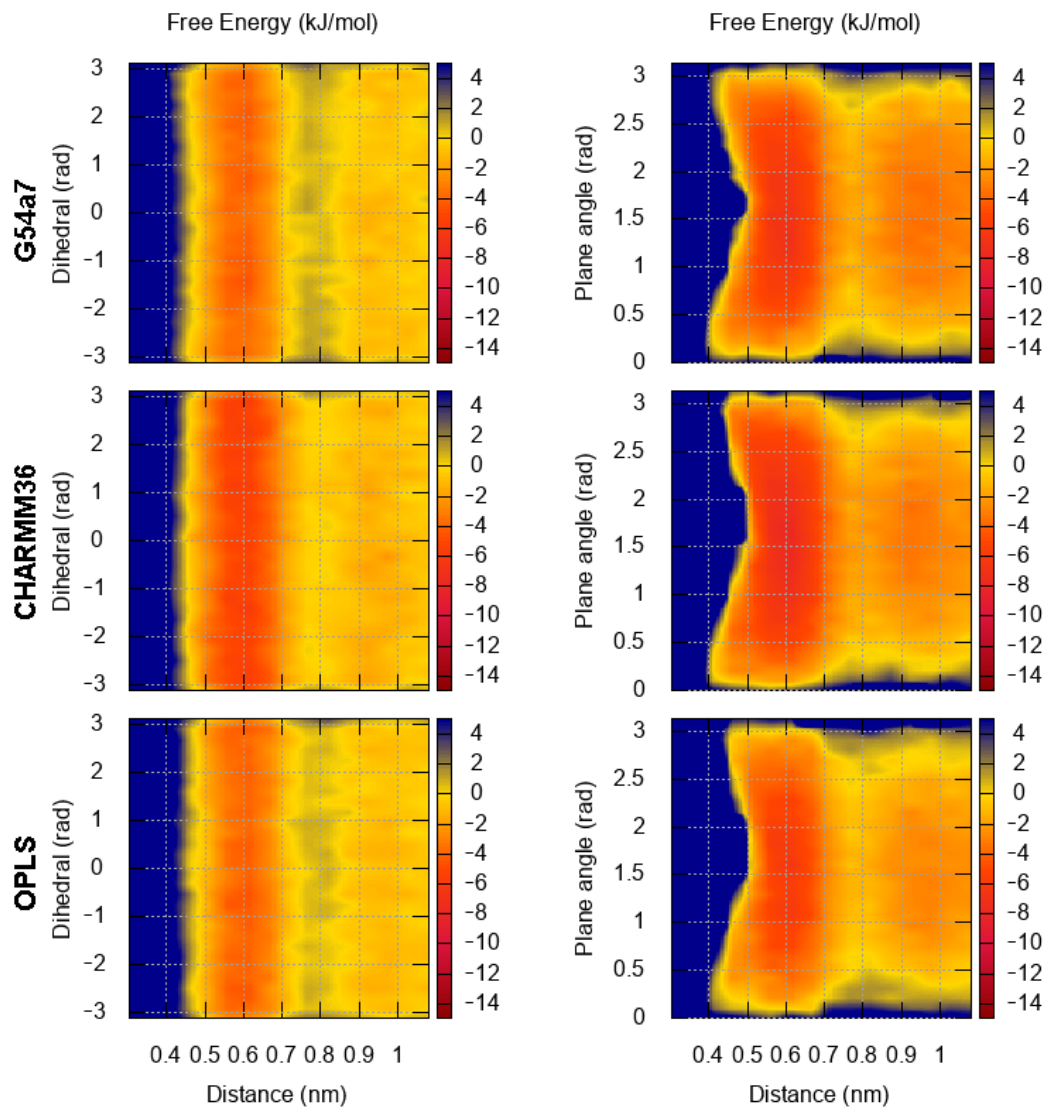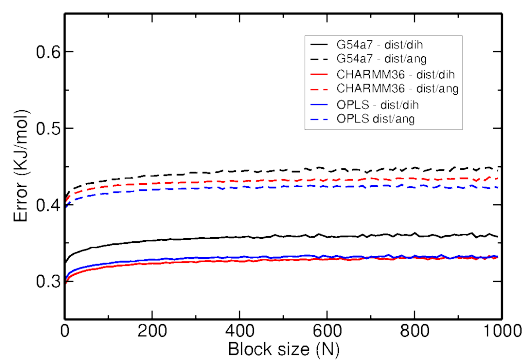

**Figure S6:** FES for the dimerization of cyclohexane (top) and statistical error of the FES calculations as a function of the block size (bottom).

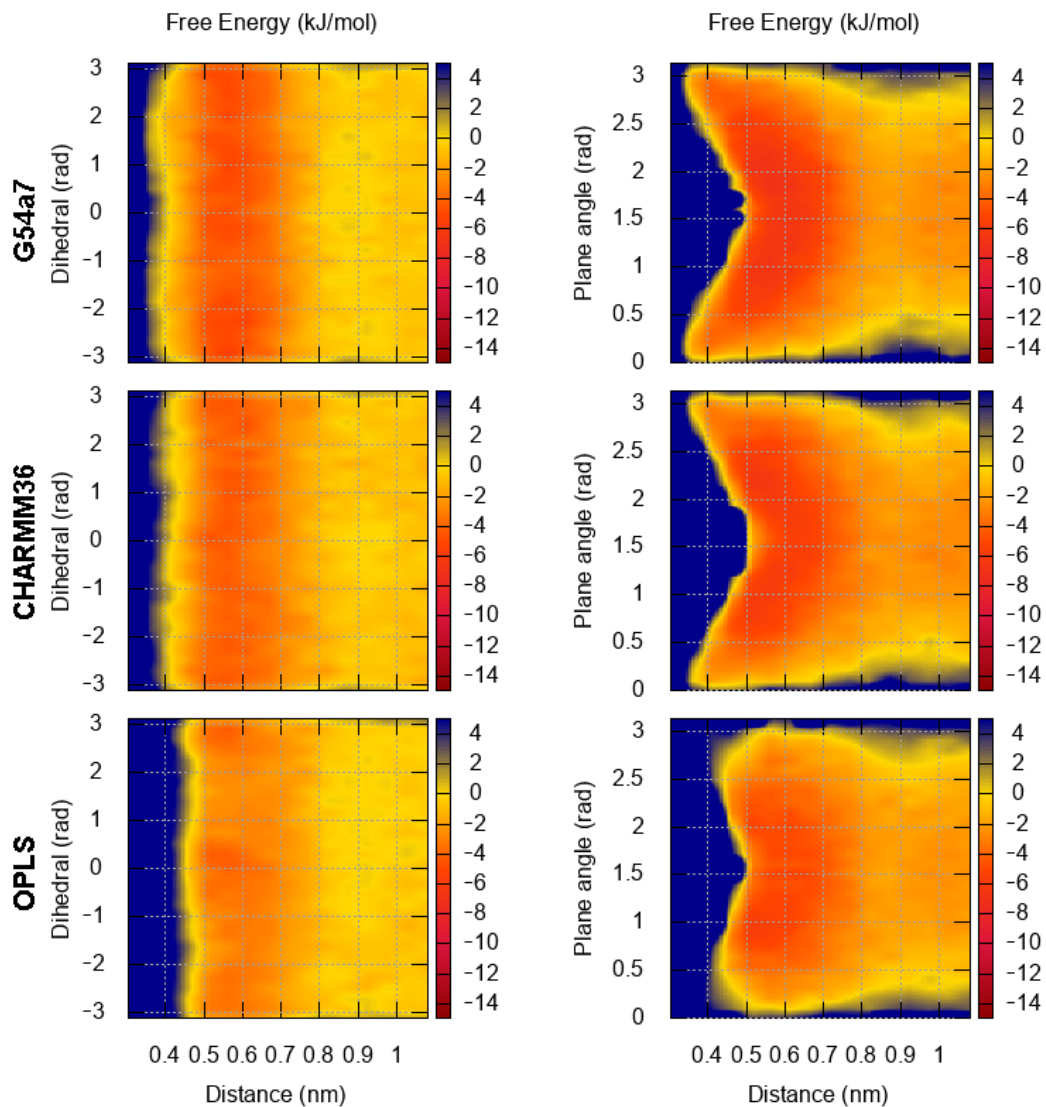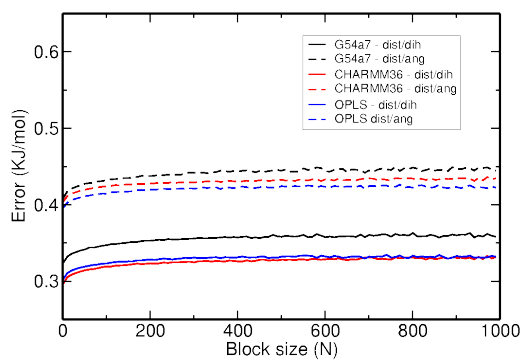

**Figure S7:** FES for the dimerization of naphthalene (top) and statistical error of the FES calculations as a function of the block size (bottom).

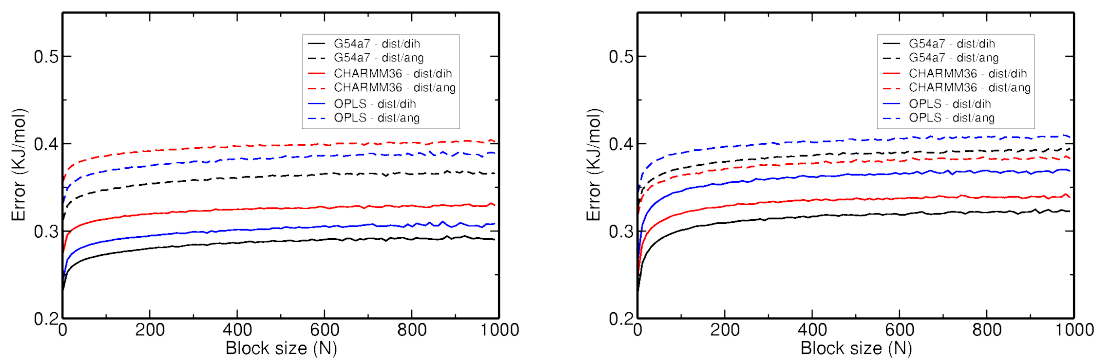

**Figure S8:** Statistical error of the FES calculations as a function of the block size for pyrene and anthracene, respectively.
